# Supplementary material for: Blood donation and health status based on SF-36: The mediating effect of cognition in blood donation
Source: PubMed Central journal article supplement (PMC6804979; doi:10.1371/journal.pone.0223657), 2019-10-22
Supplement: pone.0223657.s003.pdf [file pone.0223657.s003.pdf]

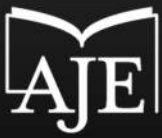

# EDITORIAL CERTIFICATE

This document certifies that the manuscript listed below was edited for proper English language, grammar, punctuation, spelling, and overall style by one or more of the highly qualified native English speaking editors at American Journal Experts.

## Manuscript title:

Blood Donation and Health-related Quality of Life: The Mediating Effect of Cognition in Blood Donation

## Authors:

Le-rong Wang, MS; Hui-mei Shi#, MS; Yan-bo Zhu\*, MD; Yan-ni Li, MS; Xiao-han Yu, MS; Mu-ran Shi, MS; Hui Yan, MS; Tong Li, MS, Jia Lu, MS; Yan-feng Suo, MS; Kun Zheng, MS; Tan Ooh Chye, MS.

## Date Issued:

May 17, 2019

## Certificate Verification Key:

5059-066F-C745-C45F-78AE

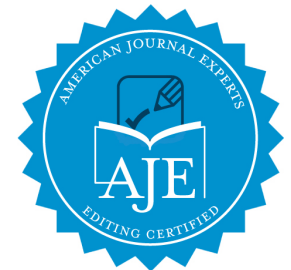

This certificate may be verified at [www.aje.com/certificate](http://www.aje.com/certificate). This document certifies that the manuscript listed above was edited for proper English language, grammar, punctuation, spelling, and overall style by one or more of the highly qualified native English speaking editors at American Journal Experts. Neither the research content nor the authors' intentions were altered in any way during the editing process. Documents receiving this certification should be English-ready for publication; however, the author has the ability to accept or reject our suggestions and changes. To verify the final AJE edited version, please visit our verification page. If you have any questions or concerns about this edited document, please contact American Journal Experts at [support@aje.com](mailto:support@aje.com).
